1 **barCoder: a tool to generate unique, orthogonal genetic tags for qPCR detection**

2 Casey B. Bernhards<sup>1,2\*</sup>, Matthew W. Lux<sup>1\*</sup>, Sarah E. Katoski<sup>1</sup>, Tyler D. P. Goralski<sup>1</sup>, Alvin T.

3 Liem<sup>1,3</sup>, Henry S. Gibbons<sup>1†</sup>

4 \*These authors contributed equally to this work

5 †Corresponding author

6 <sup>1</sup>U.S. Army Combat Capabilities Development Command Chemical Biological Center, Aberdeen

7 Proving Ground, MD 21010, USA

8 <sup>2</sup>Excet, Inc., Springfield, VA 22150, USA

9 <sup>3</sup>DCS Corporation, Abingdon, MD 21009, USA

10

11

12

13

14

15

16

17

18

19

20

21

22

23

24 **Abstract:**

25 *Background:* Tracking dispersal of microbial populations in the environment requires specific  
26 detection methods that discriminate between the target strain and all potential natural and  
27 artificial interferences, including previously utilized tester strains. Recent work has shown that  
28 genomic insertion of short identification tags, called “barcodes” here, allows detection of  
29 chromosomally tagged strains by real-time PCR. Manual design of these barcodes is feasible for  
30 small sets, but expansion of the technique to larger pools of distinct and well-functioning assays  
31 would be significantly aided by software-guided design.

32  
33 *Results:* Here we introduce barCoder, a bioinformatics tool that facilitates the process of creating  
34 sets of uniquely identifiable barcoded strains. barCoder utilizes the genomic sequence of the  
35 target strain and a set of user-specified PCR parameters to generate a list of suggested barcode  
36 “modules” that consist of binding sites for primers and probes and appropriate spacer sequences.  
37 Each module is designed to yield optimal PCR amplification and unique identification. Optimal  
38 amplification includes metrics such as ideal  $T_m$  and G+C-content, appropriate spacing, and  
39 minimal stem-loop formation; unique identification includes low BLAST hits against the target  
40 organism, previously generated barcode modules, and databases, such as NCBI. We tested the  
41 ability of our algorithm to suggest appropriate barcodes by generating 12 modules for *Bacillus*  
42 *thuringiensis* serovar *kurstaki*, a simulant for the potential biowarfare agent *Bacillus anthracis*,  
43 and three each for other potential target organisms with variable G+C content. Real-time PCR  
44 detection assays directed at barcodes were specific and yielded minimal cross-reactivity with a  
45 panel of near-neighbor and potential contaminant materials.

46

47 *Conclusions:* The barCoder algorithm facilitates the generation of barcoded biological simulants  
48 by (a) eliminating the task of creating modules by hand, (b) minimizing optimization of PCR  
49 assays, and (c) reducing effort wasted on non-unique barcode modules.

50

51 **Keywords:** DNA barcodes, genetic barcoding, genome tagging, tagged strains, microbial  
52 forensics, qPCR detection

53

54 **Background:**

55 Developing an understanding of organisms in their natural ecological niches requires the ability  
56 to measure the dynamic interaction with their environment, either at the level of the individual or  
57 at population scales. For metazoa, a number of approaches have been utilized to track  
58 individuals of a species, including simple bands or markings conferring unique identifiers,  
59 Passive Integrated Transponders (PITs), telemetry devices, and biologgers (1, 2). These  
60 approaches are limited to large organisms, as they require either direct visual inspection or  
61 electronic devices that can be attached by physical means to the body of the organism in  
62 question. As the field of environmental microbiology continues to mature, novel tools to  
63 facilitate “tag and release” studies are critical to understanding microbial interactions within  
64 existing environmental niches or in the context of introduction into new environments. Early  
65 efforts to track environmental fate of genetically modified organisms in field releases utilized  
66 fluorescently or metabolically marked strains of *Pseudomonas putida* (3, 4) and *P. fluorescens*  
67 (5, 6). Likewise, spontaneous rifampicin-resistant mutants have been used to track establishment  
68 and persistence of introduced isolates in field trials (7). However, conventional selectable,  
69 chromogenic, or fluorescent markers carry metabolic costs that can compromise the carrier

70 strain's fitness in resource-constrained environments (8), revealing the need for phenotypically  
71 neutral, non-coding, genomic insertions that can differentiate introduced strains from native  
72 flora.

73

74 The development of DNA synthesis chemistry, microarray technology, quantitative PCR (qPCR)  
75 and high-throughput sequencing resulted in the development of several important capabilities  
76 and tagging approaches. Early studies used transposons containing short synthetic barcodes to  
77 identify virulence factors in several organisms (9, 10). As oligonucleotide synthesis technology  
78 became more sophisticated and costs decreased, longer tags could be produced, resulting in the  
79 use of tagged strains to study the spatiotemporal dispersion in systems otherwise unamenable to  
80 tracking. In particular, significant work has been done to understand the details of stochastic  
81 dynamics of *Salmonella* infections by monitoring the relative quantities of tagged strains in  
82 different locations within the host (11-13). These tagged strains, known as Wild-type Isogenic  
83 Tagged Strains (WITS), contain short, unique sequences inserted into the genome to allow  
84 quantitation by qPCR (11). Similar work has been done to study population dynamics during  
85 infection for several other bacterial and viral pathogens (13-20).

86

87 The ability to track the fate of microbes introduced into an environment is also of interest to the  
88 biodefense research community. Spores of *Bacillus anthracis*, the causative agent of anthrax,  
89 were used in the high-profile 2001 anthrax mail attacks and were historically weaponized by  
90 both the United States and Russia on large scales (21). An important angle for preparedness  
91 against a potential attack includes an understanding of how spores released into the environment  
92 might disperse, persist, and migrate. The release of live *B. anthracis* spores (and indeed, even of

93 attenuated strains) in an outdoor test is impossible due to public health concerns. Instead, close  
94 biological relatives are used as simulants. In the case of *B. anthracis*, recent work has used  
95 *Bacillus thuringiensis* serovar *kurstaki* (Btk) due to its similar physiological and biochemical  
96 properties (22-26). Yet, even with the use of an adequate simulant, repeated dispersion testing  
97 on the same test site is problematic due to a need to distinguish between past and present testing,  
98 especially for a ubiquitous environmental bacterium such as Btk that is also in widespread use as  
99 a commercial biopesticide (27-30). In addition, the problem of “signature erosion” has  
100 diminished the utility of endogenous genomic signatures as detection tools as the diversity of  
101 sequence data in public databases has exploded (31, 32).

102

103 To overcome these challenges, we previously inserted unique genetic barcodes designed to  
104 enable rapid detection by qPCR into the Btk genome (24) and subsequently tested the system in a  
105 field release (23). These strains were successfully detected in field samples using the qPCR  
106 assays, but, like the earlier WITS strains, the strains constructed for our field release (23) did not  
107 exploit the full ability of bioinformatics and synthetic biology that has become available. Most  
108 notably, each of the tags required its own specific PCR assay conditions, which makes scaling up  
109 to larger numbers of barcodes prohibitive. In this work, we have built upon our previous work  
110 by developing an algorithm, called barCoder, to generate barcode sequences that are unique  
111 amongst a pool of barcoded strains and require minimal development of qPCR assays. The  
112 algorithm also provides numerous features to minimize experimental troubleshooting efforts and  
113 customize amplicon properties. Here, we present the algorithm, as well as experimental  
114 validation of its ability to generate a potentially unlimited pool of highly diverse DNA barcodes,  
115 each with its own specific qPCR assay.

116

117 **Results:**

118 *Barcode design*

119 Two major types of qPCR assays exist: assays based on intercalating dyes (e.g. SYBR Green)  
120 responsive only to double-stranded DNA, and assays based on 3'-exonuclease degradation of  
121 probe sequences effecting a signal unquenching (referred to herein as TaqMan for the probes  
122 used). In terms of assay design, both require a forward and reverse primer with similar  
123 constraints such as amplicon length,  $T_m$ , G+C-content, G+C-clamp, potential secondary  
124 structure, and primer dimer formation. The primary design difference between the qPCR assay  
125 types is a third probe sequence required only for TaqMan assays with its own recommended  
126 design guidelines. Thus, in general, the same primer set can be used for either approach with the  
127 same barcode (Fig 1A). From the perspective of qPCR assay design, the remaining spacer  
128 sequences between primers/probe are largely immaterial other than to meet ideal amplicon size  
129 targets, and therefore can be generated randomly, with constraints (see Algorithm design).

130

131 *Algorithm design*

132 The barCoder algorithm workflow is depicted in Figure 1B. The algorithm starts by generating  
133 random primers to meet PCR-related specifications. Unlike typical primer design where primer  
134 sequences are constrained by an existing sequence of interest, here there is almost complete  
135 freedom to design primers that have ideal PCR properties. Using an approximate  $T_m$  formula (see  
136 Methods), the number of A's+T's and G's+C's needed to satisfy the specified  $T_m$  value can be  
137 calculated for primers within user-adjustable constraints on length and G+C content. From this  
138 set, a sequence meeting these constraints is randomly generated and screened for several PCR-

- 139 related properties, such as maximum homopolymer repeats and secondary structure (Table 1). If
- 140 any requirements are not met, the sequence is discarded and a new sequence generated.

141 Table 1. Algorithm parameters and default values for primer design.

| Purpose            | Parameter Purpose                            | Values used in this study <sup>a</sup> |                |       |
|--------------------|----------------------------------------------|----------------------------------------|----------------|-------|
|                    |                                              | Forward Primer                         | Reverse Primer | Probe |
| Primer Constraints | Minimum Length (bases)                       | 20                                     | 20             | 20    |
|                    | Maximum Length (bases)                       | 24                                     | 24             | 30    |
|                    | Minimum Tm (°C)                              | 58                                     | 58             | 68    |
|                    | Maximum Tm (°C)                              | 60                                     | 60             | 70    |
|                    | Minimum G+C Content (%)                      | 40                                     | 40             | 40    |
|                    | Maximum G+C Content (%)                      | 60                                     | 60             | 60    |
| Primer Checks      | Maximum G Homopolymer Length (bases)         | 4                                      | 4              | 4     |
|                    | Maximum A/T/C Homopolymer Length (bases)     | 3                                      | 3              | 3     |
|                    | No G on 5' end of probe                      | n/a                                    | n/a            | Y/N   |
|                    | > 2 G+C's in last 5 bps of 3' end of primers | Y/N                                    | Y/N            | n/a   |
|                    | Any start codons present?                    | Y/N                                    | Y/N            | Y/N   |
| Primer Stem-loops  | Minimum Stem-loop Hydrogen Bonds             | 14                                     | 14             | 14    |
|                    | Minimum Stem-loop Palindrome Length          | 5                                      | 5              | 5     |
|                    | Maximum Stem-loop Palindrome Length          | 100                                    | 100            | 100   |
|                    | Maximum Stem-loop Gap Size                   | 11                                     | 11             | 11    |
|                    | Maximum Stem-loop Mismatches                 | 1                                      | 1              | 1     |

142 <sup>a</sup>Entries of “Y/N” represent checks that are pass/fail and thus do not have a parameter value per-  
 143 se.

144  
 145 A sequence that meets PCR restrictions is then tested for uniqueness. First, the sequence is  
 146 compared to a list of other primers, which includes any primers already generated locally by the  
 147 algorithm and an optional user-provided list of other primer sets of interest. Sequence “matches”  
 148 are determined by comparing raw BLAST scores divided by the raw score of a perfect match to a  
 149 user-adjustable threshold. If the sequence matches any existing primers above the threshold, the  
 150 sequence is discarded and the process restarted. Second, the genome of the organism targeted for  
 151 insertion is scanned for similar sequences by BLAST. Similarly, a set of additional genome  
 152 sequences of organisms that may be likely to be present in a sample, such as common  
 153 environmental background species or human, are scanned. Finally, the entire NCBI database is  
 154 optionally scanned for similar sequences. A separate threshold for discarding a candidate



155 sequence based on these BLAST results can be customized by the user, allowing more or less  
156 stringent criteria depending on project demands and acceptable CPU time in the case of very  
157 strict thresholds. Values used in this study are shown in Table 2.

158

159 Table 2. Algorithm parameters and default values other than for primer design.

| <b>Purpose</b>    | <b>Parameter Purpose</b>                                              | <b>Values used in this study</b> |
|-------------------|-----------------------------------------------------------------------|----------------------------------|
| BLAST             | Threshold <sup>a</sup> to reject near-matches (primers)               | 0.85                             |
|                   | Threshold <sup>a</sup> to reject near-matches (genomes)               | 0.65                             |
| Spacer Size       | Spacer Size (distance between forward/reverse primers, not inclusive) | 100                              |
| Spacer Stem-loops | Minimum Stem-loop Hydrogen Bonds                                      | 14                               |
|                   | Minimum Stem-loop Palindrome Length                                   | 10                               |
|                   | Maximum Stem-loop Palindrome Length                                   | 80                               |
|                   | Maximum Stem-loop Gap Size                                            | 11                               |
|                   | Maximum Stem-loop Mismatches                                          | 1                                |

160 <sup>a</sup>See text for explanation of threshold calculation.

161

162 A sequence that meets all PCR and uniqueness requirements is accepted for use in the barcode.  
163 The algorithm cycles through this process to create each primer and the probe sequence, each  
164 with its own set of requirement parameters. Optionally, the forward primer can be set as constant  
165 for all barcodes in a given project. Once all three primer/probe sequences for a barcode have  
166 been generated, the spacer sequences are randomly generated such that the total length  
167 requirement is met and the G+C content of the full barcode matches the G+C content of the  
168 target organism. The final check scans for potential stem-loop structures in the barcode to limit  
169 challenges during genome insertion and during amplification of the sequence. Failing this check  
170 triggers regeneration of the spacer sequences.

171

172 *Experimental Validation*

173 The barCoder algorithm was used to generate an initial set of 21 barcodes and corresponding  
174 qPCR detection primer/probe sets (sequences listed in Tables S1 and S2 in Additional file 1).  
175 Twelve of these barcodes were designed for *B. thuringiensis* serovar *kurstaki* (Btk), a surrogate  
176 for the biothreat agent *B. anthracis* with low-G+C content (35%, (33)). To demonstrate the  
177 utility of the barCoder algorithm to create barcodes for other organisms, including those with  
178 different G+C compositions, three barcodes each were designed for potential use in *Burkholderia*  
179 *pseudomallei* 1026b, (68% G+C content), *Yersinia pestis* CO92 (47%), and *Clostridium*  
180 *botulinum* Hall A (28%) (34-36).

181  
182 Assay conditions for barcode Btk1 in the pIDTSMART-AMP plasmid backbone were optimized  
183 and subsequently standard curves were generated for all 21 TaqMan qPCR assays using the same  
184 conditions (Fig. 2 and Fig. S1 in Additional file 1). All of the assays of the barcodes in plasmids  
185 performed well with qPCR efficiencies ranging from 81.1% to 100.0%, strong linear  
186 relationships ( $R^2 > 0.99$ ), and no false positive results (Table 3). Limits of detection (LODs)  
187 were all below 50 copies (the lowest plasmid concentration tested), except for barcode Btk6,  
188 where the LOD was below 500 copies (Table 3). Select barcodes were also markerlessly  
189 incorporated into the chromosomes of potential target organisms: barcode Btk1 was integrated  
190 into both Btk and *B. anthracis* Sterne, and barcode Yp1 was inserted into a *pgm*<sup>-</sup> derivative of *Y.*  
191 *pestis* CO92. Again, standard curves were generated for the TaqMan assays under the same  
192 conditions (Fig. 2). Assays using chromosomally-barcoded strains had efficiencies within the  
193 range observed for barcodes residing in plasmids (86.5% to 96.5%),  $R^2$  values above 0.99, and  
194 no false positives (Table 3). LODs were calculated as less than 15 copies and less than 2 copies  
195 for barcode Btk1 in the chromosomes of Btk and *B. anthracis* Sterne, respectively, and less than

196 25 copies for barcode Yp1 in the chromosome of *Y. pestis* CO92 *pgm*<sup>-</sup> (Table 3). LODs are  
 197 approximate as lower concentrations and Poisson distribution effects at low copy numbers were  
 198 not thoroughly interrogated.

199

200 Table 3. Evaluation of qPCR assays from generated standard curves.

| Barcode      | Template DNA        | Linearity (R <sup>2</sup> ) | LOD (Copies) | False +'s | Efficiency (%) |
|--------------|---------------------|-----------------------------|--------------|-----------|----------------|
| <b>Btk1</b>  | Plasmid             | 0.9990                      | <50          | 0/3       | 92.5           |
|              | Genomic (Btk)       | 0.9969                      | <15          | 0/3       | 91.1           |
|              | Genomic (Ba Sterne) | 0.9919                      | <2           | 0/3       | 96.5           |
| <b>Btk2</b>  | Plasmid             | 0.9984                      | <50          | 0/3       | 83.5           |
| <b>Btk3</b>  | Plasmid             | 0.9991                      | <50          | 0/3       | 98.9           |
| <b>Btk4</b>  | Plasmid             | 0.9976                      | <50          | 0/3       | 94.3           |
| <b>Btk5</b>  | Plasmid             | 0.9978                      | <50          | 0/3       | 89.9           |
| <b>Btk6</b>  | Plasmid             | 0.9996                      | <500         | 0/3       | 90.4           |
| <b>Btk7</b>  | Plasmid             | 0.9993                      | <50          | 0/3       | 84.0           |
| <b>Btk8</b>  | Plasmid             | 0.9979                      | <50          | 0/3       | 89.8           |
| <b>Btk9</b>  | Plasmid             | 0.9994                      | <50          | 0/3       | 81.1           |
| <b>Btk10</b> | Plasmid             | 0.9985                      | <50          | 0/3       | 89.9           |
| <b>Btk11</b> | Plasmid             | 0.9990                      | <50          | 0/3       | 90.6           |
| <b>Btk12</b> | Plasmid             | 0.9985                      | <50          | 0/3       | 82.5           |
| <b>Bp1</b>   | Plasmid             | 0.9996                      | <50          | 0/3       | 93.0           |
| <b>Bp2</b>   | Plasmid             | 0.9996                      | <50          | 0/3       | 100.0          |
| <b>Bp3</b>   | Plasmid             | 0.9992                      | <50          | 0/3       | 92.4           |
| <b>Cbot1</b> | Plasmid             | 0.9983                      | <50          | 0/3       | 95.1           |
| <b>Cbot2</b> | Plasmid             | 0.9982                      | <50          | 0/3       | 91.6           |
| <b>Cbot3</b> | Plasmid             | 0.9990                      | <50          | 0/3       | 86.1           |
| <b>Yp1</b>   | Plasmid             | 0.9988                      | <50          | 0/3       | 94.6           |
|              | Genomic             | 1.0000                      | <25          | 0/3       | 86.5           |
| <b>Yp2</b>   | Plasmid             | 0.9979                      | <50          | 0/3       | 96.8           |
| <b>Yp3</b>   | Plasmid             | 0.9997                      | <50          | 0/3       | 95.0           |

201

202 To test the specificity of the TaqMan qPCR assays for the corresponding barcode, each of the 12  
 203 Btk assays were tested against all 12 Btk barcodes in plasmids. This cross-reactivity panel  
 204 showed unique amplification of each Btk barcode with its cognate primer/probe set (Fig. 3). The  
 205 TaqMan qPCR assay for barcode Btk1 was also tested against a panel of potential pathogens and

206 environmental organisms (Table 4). Reactions containing the Btk strain with barcode Btk1  
207 inserted in the chromosome, either alone or in the presence of an environmental matrix (DNA  
208 from a mock microbial community or DNA extracted from soil) showed robust positive results,  
209 while the Btk1 qPCR assay did not cross-react with any of the potential contaminants.  
210

211 Table 4. Cross-reactivity of the barcode Btk1 qPCR assay against a panel of potential pathogens  
 212 and environmental contaminants.

| DNA Template <sup>a</sup>                                                                                                          | Ct <sup>b</sup> |
|------------------------------------------------------------------------------------------------------------------------------------|-----------------|
| <i>Bacillus anthracis</i> Ames35                                                                                                   | ND              |
| <i>Bacillus anthracis</i> Sterne 34F2                                                                                              | ND              |
| <i>Bacillus cereus</i> Gibson 971                                                                                                  | ND              |
| <i>Bacillus licheniformis</i> Gibson 46                                                                                            | ND              |
| <i>Bacillus megaterium</i> Ford 19                                                                                                 | ND              |
| <i>Bacillus sphaericus</i> Ford 25                                                                                                 | ND              |
| <i>Bacillus subtilis</i> subsp. <i>subtilis</i> 168                                                                                | ND              |
| <i>Bacillus thuringiensis</i> serovar <i>kurstaki</i> HD-1                                                                         | ND              |
| <i>Bacillus thuringiensis</i> subsp. <i>konkukian</i> 97-27                                                                        | ND              |
| <i>Burkholderia pseudomallei</i> 1026b                                                                                             | ND              |
| <i>Clostridium perfringens</i> WAL-14572                                                                                           | ND              |
| <i>Escherichia coli</i> EDL933                                                                                                     | ND              |
| <i>Francisella tularensis</i> subsp. <i>tularensis</i> SCHU S4                                                                     | ND              |
| <i>Micrococcus luteus</i> SK58                                                                                                     | ND              |
| <i>Neisseria meningitidis</i> 9506                                                                                                 | ND              |
| <i>Pseudomonas</i> sp. 2_1_26                                                                                                      | ND              |
| <i>Salmonella enterica</i> subsp. <i>enterica</i> LT2                                                                              | ND              |
| <i>Staphylococcus aureus</i> TCH1516                                                                                               | ND              |
| <i>Staphylococcus epidermidis</i> SK135                                                                                            | ND              |
| <i>Streptococcus pneumoniae</i> TCH8431                                                                                            | ND              |
| <i>Vibrio cholerae</i> 395                                                                                                         | ND              |
| <i>Yersinia pestis</i> CO92                                                                                                        | ND              |
| Barcode Btk1 in <i>Bacillus thuringiensis</i> serovar <i>kurstaki</i> HD-1                                                         | 23.927          |
| Microbial Mock Community B (Even, High Concentration)                                                                              | ND              |
| Microbial Mock Community B (Even, High Concentration) + Barcode Btk1 in <i>Bacillus thuringiensis</i> serovar <i>kurstaki</i> HD-1 | 23.725          |
| Soil DNA extract                                                                                                                   | ND              |
| Soil DNA extract + Barcode Btk1 in <i>Bacillus thuringiensis</i> serovar <i>kurstaki</i> HD-1                                      | 23.969          |
| Negative control (H <sub>2</sub> O)                                                                                                | ND              |

213 <sup>a</sup>qPCR reactions contained 1 ng of each DNA template indicated.

214 <sup>b</sup>Threshold cycle (Ct) values are the median of three replicates; ND, Not determinable.

215

216 **Discussion:**

217 qPCR has become a standard technique for detection of microorganisms in the environment and  
218 for diagnosis of infection (37), and, as such, is an attractive detection technology that also allows  
219 a rapid evaluation of the relative abundance of a known microorganism within a sample.  
220 However, when conducting environmental fate studies, for example, these assays must  
221 discriminate from the endogenous or native microflora, which may be uncharacterized and  
222 present signatures similar to or cross-reactive with the signature selected for detection of the  
223 experimental strain. We sought in this report to utilize a bioinformatics strategy to generate  
224 specific amplicons that require minimal assay optimization and could be introduced into  
225 organisms with minimal to no cross-reactivity with environmental and microbial signatures.

226

227 Our approach to developing unique qPCR-compatible barcodes expanded upon our previous  
228 work, in which we appropriated synthetic signatures from published microarrays and developed  
229 PCR assays based on the unique sequences generated both by the tags themselves and by their  
230 insertion into the genome (24). Because those sequences were not designed *de novo* for use in  
231 PCR detection assays, we relied on the presence of a chromosomal primer binding site and the  
232 single synthetic sequence to generate suitable amplicons. As a result, considerable optimization  
233 of the assay conditions and primer sequences was necessary during the development of those  
234 strains, and the assay conditions for each tag required slightly different optimal conditions for  
235 detection. This situation was judged as suboptimal for the development of a more diverse panel  
236 of barcodes, as new assays would need to be developed for each new sequence.

237

238 We therefore sought to develop an algorithm that would enable the high-throughput generation  
239 of amplicon sequences that could use a single PCR assay condition, and in which relative

240 proportion of each strain could be compared in a single test, e.g. across a single microplate. The  
241 assays would need to be specific to each barcode, and would need to be comparably sensitive  
242 with equivalent limits of detection. Using TaqMan™ qPCR chemistry and a stringent  
243 bioinformatic screening algorithm, we generated a panel of unique primer/probe combinations  
244 that exhibited the desired combination of selectivity, specificity, and sensitivity. Using  
245 conventional plasmids containing the barcodes as templates for the development of the assays,  
246 we demonstrate strong performance in linearity of response, sensitivity, and efficiency across 21  
247 assays using conditions optimized for a single assay. No cross-reactivity was observed across a  
248 panel of 12 of these assays. We note that the odds of randomly generating a barcode that would  
249 react with a natural sequence is vanishingly small as three 20+ bp primer sequences would need  
250 to be closely matched in the correct orientation ( $>10^{36}$  possible sequences) with spacing  
251 appropriate for PCR amplification; nonetheless, sequences are screened for uniqueness to further  
252 minimize this possibility. Inserting two of the barcodes into three different genomes, we  
253 observed conserved performance compared to plasmid assays and LODs below 25 copies, which  
254 we believe to be conservative due to Poisson distribution effects at low copy numbers.

255

256 Our barcodes have a number of potential applications. Marking strains with unique artificial  
257 signatures could aid in protecting intellectual property, particularly for production strains whose  
258 development has required significant investment in metabolic and/or genetic optimization,  
259 perhaps in combination with other techniques such as DNA steganography (38). While not as  
260 information-rich as longer steganographic tags or watermarks (39, 40), qPCR barcodes have the  
261 advantage of not requiring further sequencing and informatic analysis to detect and/or verify  
262 their presence; they must simply be amplified using appropriate primers and probes. In one

263 scenario, a set of barcodes could be inserted at defined intervals throughout a large DNA  
264 molecule used for information storage, and utilized to provide a preliminary indicator of the  
265 stability of the archive prior to full sequencing.

266

267 These sequences and their associated assays might also find use in forensic applications. In  
268 particular, one might imagine their use as molecular taggants that could be spiked into samples  
269 by field technicians, and their detection in DNA samples by the reference laboratories would  
270 serve to verify the origin of the sample. In a similar vein, these same tools could be used in the  
271 future for downstream attribution of accidental or deliberate release of organisms (41). Select  
272 agent strains, in particular, could be tagged, distributed to end-user communities, and then any  
273 material from the scene of a biocrime could be rapidly amplified using the library of primers and  
274 probes, enabling the rapid focus of investigative resources on those potential sources, while  
275 excluding the majority of the research laboratories that possess variants containing other  
276 barcodes. Any mechanism by which artificial genetic diversity can be introduced into the largely  
277 clonal populations of laboratory strains would be useful as all known acts of bioterrorism to date  
278 have utilized common laboratory strains (e.g. *B. anthracis* Ames Ancestor in the 2001 U.S.  
279 Mail/Amerithrax case; *S. enterica* serovar *typhimurium* 14028s in the Rajneeshi cult attacks of  
280 1984) (42). In the case of the Amerithrax samples, discriminating between samples present in  
281 these laboratories relied on presence of several spontaneous mutants whose discovery and  
282 characterization required astute microbiologists and what were at the time Herculean sequencing  
283 efforts (43, 44). The deliberate incorporation of end-user-specific sequences into such  
284 commonly available strains could immeasurably speed identification of potential originating  
285 laboratories, would help investigators narrow their focus to a subset of potential sources, and



286 would help exclude uninvolved laboratories working on similar research as potential sources.  
287 Furthermore, the presence of such signatures (and the knowledge that significant additional  
288 effort would be required to disguise the source of a sample) could deter potential malefactors  
289 within those laboratories even if the location, sequence, and properties of the sequence were  
290 known.

291

## 292 **Conclusions:**

293 To our knowledge, barCoder represents the first completely *in silico* method for generating both  
294 a synthetic target for qPCR and the primers/probe to amplify the target, and optimal assay  
295 conditions for detection of a diverse range of barcodes. We demonstrated that generated  
296 barcodes all perform well under a single set of assay conditions and show no cross-reactivity  
297 with themselves or environmental contaminants. Insertion of the barcodes into the genomes of  
298 three organisms of interest maintained the key properties of the barcodes. We anticipate  
299 barCoder finding utility in applications such as environmental fate studies, intellectual property,  
300 and microbial forensics.

301

## 302 **Methods**

### 303 *Algorithm Design*

304 All software was written in Perl. G+C and A+T constraints were calculated using the following  
305 formula:

$$T_m = 69.4 + \frac{41 * (n_{GC} - 16.4)}{n_{total}}$$

306 where  $n_{GC}$  is the number of G or C bases and  $n_{total}$  is the length of the primer.

307 Most bioinformatics functions were implemented using existing BioPerl modules. EMBOSS  
308 software, called by BioPerl, was used to predict stem-loop structures. All BLAST runs used  
309 default BioPerl parameters. Software is available on GitHub  
310 (<https://github.com/ECBCgit/BarcodeR>).

311

### 312 *barCoder-designed elements and sources of DNA*

313 All barcode modules were designed using the barCoder algorithm using the values listed in  
314 Tables 1 and 2. For the BLAST step against the target organism genome sequence, the following  
315 NCBI accession numbers were used: *B. thuringiensis* serovar *kurstaki*, NZ\_CP010005.1; *B.*  
316 *pseudomallei* 1026b, NC\_017831 (chromosome 1) and NC\_017832 (chromosome 2); *C.*  
317 *botulinum* Hall A, NC\_009495.1; *Y. pestis* CO92, NC\_003143. All barcodes, primers, and  
318 probes were obtained from Integrated DNA Technologies, Inc. (IDT, Coralville, IA) and their  
319 sequences listed in Tables S1 and S2 in Additional file 1. Btk barcodes were designed with  
320 SacI/NheI restriction sites flanking the synthetic elements to facilitate later subcloning.  
321 Barcodes were received as “minigenes” inserted in the pIDTSMART-AMP plasmid backbone  
322 and were propagated in NEB® 5-alpha *E. coli* (New England Biolabs, Inc., Ipswich, MA) on  
323 Luria-Bertani (LB) agar and in LB broth with 100 µg/ml ampicillin at 37°C. Plasmid DNA was  
324 isolated using the QIAprep Spin Miniprep Kit (Qiagen, Hilden, Germany). DNA probes were  
325 ordered as PrimeTime double-quenched qPCR probes containing the 5' FAM fluorophore, 3'  
326 Iowa Black FQ quencher, and internal ZEN quencher. The sources of the DNA used for the  
327 cross-reactivity panel of pathogenic and environmental organisms are given in Table S3 in  
328 Additional file 1.

329

330 *qPCR*

331 All qPCR experiments were run on an Applied Biosystems 7900HT Real-Time PCR System  
332 (Applied Biosystems, Foster City, CA) using Applied Biosystems MicroAmp optical 384-well  
333 reaction plates (catalog number 4309849) sealed with Applied Biosystems MicroAmp optical  
334 adhesive film (catalog number 4311971). Optimized 20  $\mu$ L reactions included Applied  
335 Biosystems TaqMan® Universal PCR Master Mix (catalog number 4304437), forward and  
336 reverse primers each at a final concentration of 900 nM, DNA probe at a final concentration of  
337 250 nM, 1  $\mu$ L DNA template at the indicated concentration, and nuclease-free water. TaqMan  
338 assays used the following thermocycler protocol: 1 cycle of 50°C for 2 min, 1 cycle of 95°C for  
339 10 min, and 40 cycles of 95°C for 15 sec and 55°C for 1 min. The standard curve properties of  
340 each assay were assessed by performing 10-fold serial dilutions of the template DNA in  
341 nuclease-free water. Efficiency and linearity ( $R^2$ ) values for each qPCR standard curve were  
342 calculated using the median Ct of three replicates for each template DNA dilution. Data points  
343 corresponding to the highest amount of template DNA tested ( $10^{-8}$  g for genomic DNA,  $10^{-9}$  g  
344 for plasmid DNA) were omitted from these analyses in all cases as the Ct values tended to be  
345 non-linear with the other data points of the standard curve. LODs were conservatively estimated  
346 using the lowest amount of template DNA tested that produced a Ct value  $< 40$  for all three  
347 replicates.

348

349 *Construction of genomically-barcoded strains*

350 *B. thuringiensis* and *B. anthracis* strains were routinely cultured on Brain Heart Infusion (BHI)  
351 agar and in BHI broth at 30°C (*B. thuringiensis*) or 37°C (*B. anthracis*). Unless otherwise  
352 indicated, *Y. pestis* strains were grown on BHI agar or Tryptic Soy Agar (TSA), and in BHI broth

353 at 28–30°C. Genomic DNA was extracted using the UltraClean Microbial DNA Isolation Kit  
354 (MOBIO Laboratories, Inc., Carlsbad, CA). Barcode Btk1 was selected to construct a strain in  
355 which the barcode was markerlessly incorporated into the chromosome of *B. thuringiensis*  
356 serovar *kurstaki* HD-1 (24, 33) (obtained from the DoD Unified Culture Collection  
357 (<https://www.usamriid.army.mil/ucc/>)). The insertion was generated at the same locus that was  
358 identified and modified in our previous report (within Target 1, (24)). This corresponds to an  
359 insertion between positions 4,834,064 and 4,834,065 of RefSeq accession number  
360 NZ\_CP010005.1. Plasmid pRP1028-T1-PL (sequence provided in Additional file 2), a  
361 derivative of pRP1028 (45), was designed specifically for incorporating synthetic elements  
362 within this target region of the Btk chromosome and was synthesized by DNA2.0 (Menlo Park,  
363 CA). Plasmid pRP1028-T1-PL contains 1,550 bp of DNA homologous to the Btk chromosomal  
364 insertion region between the pRP1028 HindIII and BamHI sites, as well as a 36-bp polylinker  
365 within the homology region. Following digestion of plasmid pIDTSMART-AMP:Barcode Btk1  
366 with SacI and NheI, the Btk1 barcode was gel extracted (QIAquick Gel Extraction Kit, Qiagen,  
367 Hilden, Germany) and ligated with pRP1028-T1-PL that had been digested with the same  
368 restriction enzymes. This pRP1028-T1-PL derivative containing barcode Btk1 was introduced  
369 into Btk, and the barcode was incorporated into the chromosome using the markerless allelic  
370 exchange strategy described previously (45). Successful barcode integration into the Btk  
371 chromosome was verified by PCR amplification of the target locus and SacI/NheI digestion of  
372 the resulting amplicon. Construction of a strain of *B. anthracis* Sterne 34F2 with barcode Btk1  
373 in the chromosome was previously published (46).

374

375 For construction of a strain of *Y. pestis* CO92 *pgm*<sup>-</sup> with barcode Yp1 markerlessly inserted in  
376 the chromosome, the locus between the convergently transcribed genes YPO0388 and  
377 YPO0392a (RefSeq accession number NC\_003143.1) was selected using rules adopted from  
378 Buckley et al. (24), in combination with the PATRIC database (47) and available transcriptome  
379 sequencing (RNA-seq) data (SRA accession numbers SRR1013703, SRR1013704,  
380 SRR1013705, SRR1041589), to identify a potentially neutral insertion region. The barcode was  
381 then inserted into the chromosome between positions 406,742 and 406,743 via the method  
382 described by Sun et al. (48), which utilizes  $\lambda$  Red recombination and *sacB* counterselection.  
383 Briefly, plasmid pKD46 (CGSC #7739, (48)) containing the genes for  $\lambda$  Red recombination was  
384 electroporated into a strain of *Y. pestis* CO92 *pgm*<sup>-</sup> (strain R88, Robert Perry, University of  
385 Kentucky). A linear DNA fragment containing a *cat-sacB* cassette flanked by DNA homologous  
386 to the *Y. pestis* chromosomal insertion region was electroporated into this pKD46-containing  
387 strain of *Y. pestis*, and successful integrants were selected on media containing chloramphenicol.  
388 Following electroporation with a linear DNA fragment containing barcode Yp1 flanked by  
389 homologous DNA and selection on media containing sucrose, the *cat-sacB* cassette in the  
390 chromosome was replaced with the barcode. The resulting strain was subsequently cured of  
391 pKD46, and successful barcode insertion was verified by PCR amplification and sequencing.  
392 Whole-genome sequencing (MiSeq, Illumina) was also performed to confirm the absence of off-  
393 target modifications. Primers used to construct this barcoded strain of *Y. pestis* are listed in  
394 Table S4 in Additional file 1. To generate the *cat-sacB* cassette, the *cat* gene was PCR amplified  
395 from plasmid pKD3 (CGSC #7631, (49)) with primers #1 and #2, and the *sacB* gene was PCR  
396 amplified from plasmid p88171 (synthesized plasmid with pJ207 backbone and *sacB* gene from  
397 *Bacillus subtilis*, DNA 2.0, Menlo Park, CA) with primers #3 and #4. The two PCR amplicons

398 were purified (QIAquick PCR Purification Kit, Qiagen, Hilden, Germany) and joined together by  
399 overlap extension PCR (50) using primers #1 and #4. The *cat-sacB* cassette was gel extracted  
400 and cloned between the SacI and BamHI sites of pUC19 to create plasmid pCBV4. To construct  
401 the *cat-sacB* cassette flanked by homologous DNA, the *cat-sacB* cassette was PCR amplified  
402 from pCBV4 with primers #5 and #6. Approximately 500 bp flanking each side of the barcode  
403 insertion point were separately PCR amplified from the *Y. pestis* CO92 *pgm*<sup>-</sup> chromosome;  
404 primers #7 and #8 were used to amplify upstream DNA, and primers #9 and #10 were used to  
405 amplify downstream DNA. The three purified PCR amplicons (up flanking region, *cat-sacB*  
406 cassette, and down flanking region) were joined together by overlap extension PCR (50) using  
407 primers #7 and #10, and the resulting amplicon was gel extracted and cloned into the  
408 pCR<sup>TM</sup>4Blunt-TOPO® vector (Invitrogen, Carlsbad, CA) to generate plasmid pCBV6. The  
409 linear DNA fragment containing the *cat-sacB* cassette flanked on both sides by *Y. pestis* CO92  
410 *pgm*<sup>-</sup> DNA was PCR amplified from pCBV6 with primers #7 and #10. To create barcode Yp1  
411 flanked by homologous DNA, the barcode was PCR amplified from the synthesized plasmid  
412 pIDTSMART-AMP:Barcode Yp1 using primers #11 and #12. Approximately 500 bp flanking  
413 each side of the barcode insertion point were separately PCR amplified from the *Y. pestis* CO92  
414 *pgm*<sup>-</sup> chromosome; primers #7 and #13 were used to amplify upstream DNA, and primers #10  
415 and #14 were used to amplify downstream DNA. The three purified PCR amplicons (up  
416 flanking region, barcode, and down flanking region) were joined by overlap extension PCR (50)  
417 using primers #7 and #10, and the resulting amplicon was gel extracted and cloned into the  
418 pCR<sup>TM</sup>4Blunt-TOPO® vector (Invitrogen, Carlsbad, CA) to generate plasmid pCBV9. The  
419 linear DNA fragment containing barcode Yp1 flanked on both sides by *Y. pestis* CO92 *pgm*<sup>-</sup>  
420 DNA was PCR amplified from pCBV9 with primers #7 and #10.

421

422 **Declarations**

423

424 *Ethics approval and consent to participate*

425 Not applicable

426

427 *Consent for publication*

428 Not applicable

429

430 *Availability of data and material*

431 All raw data to the level of Ct values that were generated and analyzed during this study are

432 included in the article and its additional files.

433

434 *Competing interests*

435 The authors declare that they have no competing interests.

436

437 *Funding*

438 Funding for this work was provided by the Defense Threat Reduction Agency under project

439 CB3654 and by the Defense Threat Reduction Agency/National Research Council Postdoctoral

440 Research Associateship Program (to CBB). This work is approved for public release. The

441 opinions expressed in this report are those of the authors and do not represent official policy of

442 the United States Government or any of its agencies.

443

444 *Authors' contributions*

445 CBB inserted barcodes into *B. anthracis* and *Y. pestis*, designed and performed qPCR  
446 experiments, analyzed data, and wrote the manuscript. MWL developed the algorithm, designed  
447 qPCR experiments, analyzed data, and wrote the manuscript. SEK optimized qPCR protocols.  
448 TDPG inserted barcode Btk1 into Btk. ATL updated the algorithm for publication. HSG  
449 conceived and led the project, analyzed data, and wrote the manuscript.

450

451 *Acknowledgements*

452 We thank F. Chris Minion (Iowa State University) for the generous gift of *Y. pestis* strain R88.  
453 We also thank Mark Karavis (CCDC CBC) for whole-genome sequencing, and Pierce Roth,  
454 Edward Fochler (DCS Corp/CCDC CBC), and Michael Krepps (BrightEdge Investments) for  
455 bioinformatics support.

456

457 **Additional Files:**

458 Additional file 1.docx: Supplementary Tables and Figure. Tables S1 contains sequences for the  
459 21 barcodes designed with the barCoder algorithm. Table S2 contains primer and probe  
460 sequences for each barcode module. Table S3 provides the sources of DNA used in the cross-  
461 reactivity panel shown in Table 4. Table S4 contains sequences of the primers used to construct  
462 the barcoded strain of *Y. pestis* CO92 *pgm*<sup>-</sup>. Figure S1 shows additional qPCR standard curves.

463

464 Additional file 2.gbk: Plasmid pRP1028-T1-PL sequence. This file contains the complete  
465 annotated sequence for the plasmid designed for incorporating synthetic elements within the  
466 target region of the Btk chromosome.



467

468 Additional file 3.xlsx: Standard curve data. This file contains Ct values and calculations used to  
469 generate and analyze qPCR standard curves for all 21 barcodes (in the plasmid backbone and  
470 inserted in the genome, if applicable).

471

472 Additional file 4.xlsx: Raw data for the cross-reactivity panel of Btk barcodes and qPCR assays.  
473 This file contains raw Ct values from the cross-reactivity panel of the 12 Btk qPCR assays  
474 against the 12 Btk barcodes.

475

476 Additional file 5.xlsx: Raw data for the Btk1 qPCR assay cross-reactivity panel. This file  
477 contains the raw Ct values from the cross-reactivity panel of the barcode Btk1 qPCR assay  
478 against a panel of potential pathogens and environmental contaminants.

479

480

481

482

## 483 **Figure Legends**

484

485 Figure 1. Overview of barcode design and algorithm work flow. A) Barcodes consist of two  
486 synthetic primer binding sites, a probe annealing site, and two spacer regions. Spacer regions  
487 can be adjusted to match the overall G+C content of the organism to be barcoded. B) barCoder  
488 algorithm work flow.

489

490 Figure 2. Representative qPCR assay standard curves. Curves were generated using A) barcode  
491 Btk1 in the pIDTSMART-AMP plasmid backbone, B) barcode Btk1 inserted into the *B.*  
492 *thuringiensis kurstaki* chromosome, C) barcode Btk1 inserted into the *B. anthracis* Sterne  
493 chromosome, and D) barcode Yp1 inserted into the *Y. pestis* CO92 *pgm*<sup>-</sup> chromosome. For each  
494 standard curve, data from three replicates and a trendline are shown. Standard curves for the  
495 remaining barcodes in the plasmid backbone are shown in Figure S1 in Additional file 1.

496 □ Ct value not determinable for 2/3 replicates.

497 □ Ct value not determinable for 3/3 replicates.

498

499 Figure 3. Cross-reactivity of the 12 Btk qPCR assays against the 12 Btk barcodes. For each  
500 qPCR reaction, 10<sup>-12</sup>g (~450,000 copies) of the pIDTSMART-AMP plasmid backbone  
501 containing the Btk barcode indicated was used as DNA template. Threshold cycle (Ct) values  
502 shown are the median of three replicates; ND, Not determinable.

503 <sup>a</sup>1/3 replicates gave a Ct value of 37.087.

504

## 505 References

506

- 507 1. Yan R-C, P. WR. Trends and perspectives in animal-attached remote sensing. *Frontiers in*  
508 *Ecology and the Environment*. 2005;3(8):437-44.
- 509 2. Gibbons WJ, Andrews KM. PIT Tagging: Simple Technology at Its Best. *BioScience*.  
510 2004;54(5):447-54.
- 511 3. Glandorf DC, van der Sluis I, Anderson AJ, Bakker PA, Schippers B. Agglutination, adherence,  
512 and root colonization by fluorescent pseudomonads. *Appl Environ Microbiol*. 1994;60(6):1726-33.
- 513 4. Glandorf DC, Verheggen P, Jansen T, Jorritsma JW, Smit E, Leeftang P, et al. Effect of  
514 genetically modified *Pseudomonas putida* WCS358r on the fungal rhizosphere microflora of field-grown  
515 wheat. *Appl Environ Microbiol*. 2001;67(8):3371-8.
- 516 5. De Leij F, Sutton EJ, Whipps JM, Fenlon JS, Lynch JM. Impact of Field Release of Genetically  
517 Modified *Pseudomonas fluorescens* on Indigenous Microbial Populations of Wheat. *Appl Environ*  
518 *Microbiol*. 1995;61(9):3443-53.
- 519 6. Krishnamurthy K, Gnanamanickam SS. Biological Control of Rice Blast by *Pseudomonas*  
520 *fluorescens* Strain Pf7-14: Evaluation of a Marker Gene and Formulations. *Biological Control*.  
521 1998;13(3):158-65.
- 522 7. Moenne-Loccoz Y, Powell J, Higgins P, McCarthy J, O'Gara F. An investigation of the impact of  
523 biocontrol *Pseudomonas fluorescens* F113 on the growth of sugarbeet and the performance of subsequent  
524 clover-*Rhizobium* symbiosis. *Appl Soil Ecol*. 1998;7(3):225-37.
- 525 8. De Leij F, Thomas CE, Bailey MJ, Whipps JM, Lynch JM. Effect of Insertion Site and Metabolic  
526 Load on the Environmental Fitness of a Genetically Modified *Pseudomonas fluorescens* Isolate. *Appl*  
527 *Environ Microbiol*. 1998;64(7):2634-8.
- 528 9. Hensel M, Shea J, Gleeson C, Jones M, Dalton E, Holden D. Simultaneous identification of  
529 bacterial virulence genes by negative selection. *Science*. 1995;269(5222):400-3.
- 530 10. Mazurkiewicz P, Tang CM, Boone C, Holden DW. Signature-tagged mutagenesis: barcoding  
531 mutants for genome-wide screens. *Nat Rev Genet*. 2006;7(12):929-39.
- 532 11. Grant AJ, Restif O, McKinley TJ, Sheppard M, Maskell DJ, Mastroeni P. Modelling within-host  
533 spatiotemporal dynamics of invasive bacterial disease. *PLoS Biol*. 2008;6(4):e74.
- 534 12. Mastroeni P, Grant A. Dynamics of spread of *Salmonella enterica* in the systemic compartment.  
535 *Microbes Infect*. 2013;15(13):849-57.
- 536 13. Varble A, Albrecht RA, Backes S, Crumiller M, Bouvier NM, Sachs D, et al. Influenza A virus  
537 transmission bottlenecks are defined by infection route and recipient host. *Cell host & microbe*.  
538 2014;16(5):691-700.
- 539 14. Lauring AS, Andino R. Exploring the fitness landscape of an RNA virus by using a universal  
540 barcode microarray. *J Virol*. 2011;85(8):3780-91.
- 541 15. Melton-Witt JA, McKay SL, Portnoy DA. Development of a Single-Gene, Signature-Tag-Based  
542 Approach in Combination with Alanine Mutagenesis To Identify Listeriolysin O Residues Critical for the  
543 In Vivo Survival of *Listeria monocytogenes*. *Infection and Immunity*. 2012;80(6):2221-30.
- 544 16. Melton-Witt JA, Rafelski SM, Portnoy DA, Bakardjiev AI. Oral infection with signature-tagged  
545 *Listeria monocytogenes* reveals organ-specific growth and dissemination routes in guinea pigs. *Infect*  
546 *Immun*. 2012;80(2):720-32.
- 547 17. Rego RO, Bestor A, Stefka J, Rosa PA. Population bottlenecks during the infectious cycle of the  
548 Lyme disease spirochete *Borrelia burgdorferi*. *PLoS One*. 2014;9(6):e101009.
- 549 18. Gerlini A, Colomba L, Furi L, Braccini T, Manso AS, Pammolli A, et al. The role of host and  
550 microbial factors in the pathogenesis of pneumococcal bacteraemia arising from a single bacterial cell  
551 bottleneck. *PLoS Pathog*. 2014;10(3):e1004026.

- 552 19. Martin CJ, Cadena AM, Leung VW, Lin PL, Maiello P, Hicks N, et al. Digitally Barcoding  
553 *Mycobacterium tuberculosis* Reveals In Vivo Infection Dynamics in the Macaque Model of Tuberculosis.  
554 MBio. 2017;8(3).
- 555 20. Abel S, Abel zur Wiesch P, Davis BM, Waldor MK. Analysis of Bottlenecks in Experimental  
556 Models of Infection. PLoS Pathog. 2015;11(6):e1004823.
- 557 21. Leitenberg M, Zilinskas RA. The Soviet Biological Weapons Program: A History. Cambridge,  
558 MA: Harvard University Press; 2012. 960 p.
- 559 22. Greenberg DL, Busch JD, Keim P, Wagner DM. Identifying experimental surrogates for *Bacillus*  
560 *anthracis* spores: a review. Investig Genet. 2010;1(1):4.
- 561 23. Emanuel PA, Buckley PE, Sutton TA, Edmonds JM, Bailey AM, Rivers BA, et al. Detection and  
562 tracking of a novel genetically tagged biological simulant in the environment. Appl Environ Microbiol.  
563 2012;78(23):8281-8.
- 564 24. Buckley P, Rivers B, Katoski S, Kim MH, Kragl FJ, Broomall S, et al. Genetic barcodes for  
565 improved environmental tracking of an anthrax simulant. Appl Environ Microbiol. 2012;78(23):8272-80.
- 566 25. Bishop AH, Stapleton HL. Aerosol and Surface Deposition Characteristics of Two Surrogates for  
567 *Bacillus anthracis* Spores. Appl Environ Microbiol. 2016;82(22):6682-90.
- 568 26. Bishop AH, Robinson CV. *Bacillus thuringiensis* HD-1 Cry- : development of a safe, non-  
569 insecticidal simulant for *Bacillus anthracis*. J Appl Microbiol. 2014;117(3):654-62.
- 570 27. Merrill L, Dunbar J, Richardson J, Kuske CR. Composition of bacillus species in aerosols from  
571 11 U.S. cities. J Forensic Sci. 2006;51(3):559-65.
- 572 28. Van Cuyk S, Duval N, Omberg KM. *Bacillus thuringiensis*: Presence and Persistence in the  
573 Environment. Los Alamos National Laboratory, 2008 LA-UR-08-04878.
- 574 29. Crickmore N. Beyond the spore – past and future developments of *Bacillus thuringiensis* as a  
575 biopesticide. Journal of Applied Microbiology. 2006;101(3):616-9.
- 576 30. Van Cuyk S, Deshpande A, Hollander A, Duval N, Ticknor L, Layshock J, et al. Persistence of  
577 *Bacillus thuringiensis* subsp. *kurstaki* in Urban Environments following Spraying. Applied and  
578 Environmental Microbiology. 2011;77(22):7954-61.
- 579 31. Sahl JW, Vazquez AJ, Hall CM, Busch JD, Tuanyok A, Mayo M, et al. The Effects of Signal  
580 Erosion and Core Genome Reduction on the Identification of Diagnostic Markers. mBio.  
581 2016;7(5):e00846-16.
- 582 32. Gardner SN, Frey KG, Redden CL, Thissen JB, Allen JE, Allred AF, et al. Targeted amplification  
583 for enhanced detection of biothreat agents by next-generation sequencing. BMC research notes.  
584 2015;8:682-.
- 585 33. Johnson SL, Daligault HE, Davenport KW, Jaissle J, Frey KG, Ladner JT, et al. Complete  
586 genome sequences for 35 biothreat assay-relevant bacillus species. Genome Announc. 2015;3(2).
- 587 34. Holden MT, Titball RW, Peacock SJ, Cerdeno-Tarraga AM, Atkins T, Crossman LC, et al.  
588 Genomic plasticity of the causative agent of melioidosis, *Burkholderia pseudomallei*. Proc Natl Acad Sci  
589 U S A. 2004;101(39):14240-5.
- 590 35. Parkhill J, Wren BW, Thomson NR, Titball RW, Holden MT, Prentice MB, et al. Genome  
591 sequence of *Yersinia pestis*, the causative agent of plague. Nature. 2001;413(6855):523-7.
- 592 36. Sebahia M, Peck MW, Minton NP, Thomson NR, Holden MT, Mitchell WJ, et al. Genome  
593 sequence of a proteolytic (Group I) *Clostridium botulinum* strain Hall A and comparative analysis of the  
594 clostridial genomes. Genome Res. 2007;17(7):1082-92.
- 595 37. Kralik P, Ricchi M. A Basic Guide to Real Time PCR in Microbial Diagnostics: Definitions,  
596 Parameters, and Everything. Frontiers in Microbiology. 2017;8:108.
- 597 38. Liss M, Daubert D, Brunner K, Kliche K, Hammes U, Leiberer A, et al. Embedding Permanent  
598 Watermarks in Synthetic Genes. PLOS ONE. 2012;7(8):e42465.
- 599 39. Heider D, Barnekow A. DNA watermarks: a proof of concept. BMC Mol Biol. 2008;9:40.
- 600 40. Gibson DG, Benders GA, Andrews-Pfannkoch C, Denisova EA, Baden-Tillson H, Zaveri J, et al.  
601 Complete chemical synthesis, assembly, and cloning of a *Mycoplasma genitalium* genome. Science.  
602 2008;319(5867):1215-20.

- 603 41. Jupiter DC, Ficht TA, Samuel J, Qin QM, de Figueiredo P. DNA watermarking of infectious  
604 agents: progress and prospects. *PLoS Pathog.* 2010;6(6):e1000950.
- 605 42. Torok TJ, Tauxe RV, Wise RP, Livengood JR, Sokolow R, Mauvais S, et al. A large community  
606 outbreak of salmonellosis caused by intentional contamination of restaurant salad bars. *JAMA.*  
607 1997;278(5):389-95.
- 608 43. Anonymous. Amerithrax Investigative Summary. Washington, DC: Department of Justice, 2010.
- 609 44. Rasko DA, Worsham PL, Abshire TG, Stanley ST, Bannan JD, Wilson MR, et al. *Bacillus*  
610 *anthracis* comparative genome analysis in support of the Amerithrax investigation. *Proc Natl Acad Sci U*  
611 *S A.* 2011;108(12):5027-32.
- 612 45. Plaut RD, Stibitz S. Improvements to a Markerless Allelic Exchange System for *Bacillus*  
613 *anthracis*. *PLoS One.* 2015;10(12):e0142758.
- 614 46. Cote CK, Buhr T, Bernhards CB, Bohmke MD, Calm AM, Esteban-Trexler JS, et al. A Standard  
615 Method To Inactivate *Bacillus anthracis* Spores to Sterility via Gamma Irradiation. *Appl Environ*  
616 *Microbiol.* 2018;84(12).
- 617 47. Wattam AR, Abraham D, Dalay O, Disz TL, Driscoll T, Gabbard JL, et al. PATRIC, the bacterial  
618 bioinformatics database and analysis resource. *Nucleic Acids Res.* 2014;42(Database issue):D581-91.
- 619 48. Sun W, Wang S, Curtiss R, 3rd. Highly efficient method for introducing successive multiple  
620 scarless gene deletions and markerless gene insertions into the *Yersinia pestis* chromosome. *Appl Environ*  
621 *Microbiol.* 2008;74(13):4241-5.
- 622 49. Datsenko KA, Wanner BL. One-step inactivation of chromosomal genes in *Escherichia coli* K-12  
623 using PCR products. *Proc Natl Acad Sci U S A.* 2000;97(12):6640-5.
- 624 50. Horton RM, Hunt HD, Ho SN, Pullen JK, Pease LR. Engineering hybrid genes without the use of  
625 restriction enzymes: gene splicing by overlap extension. *Gene.* 1989;77(1):61-8.
- 626

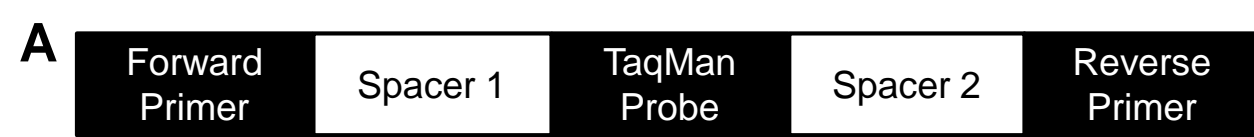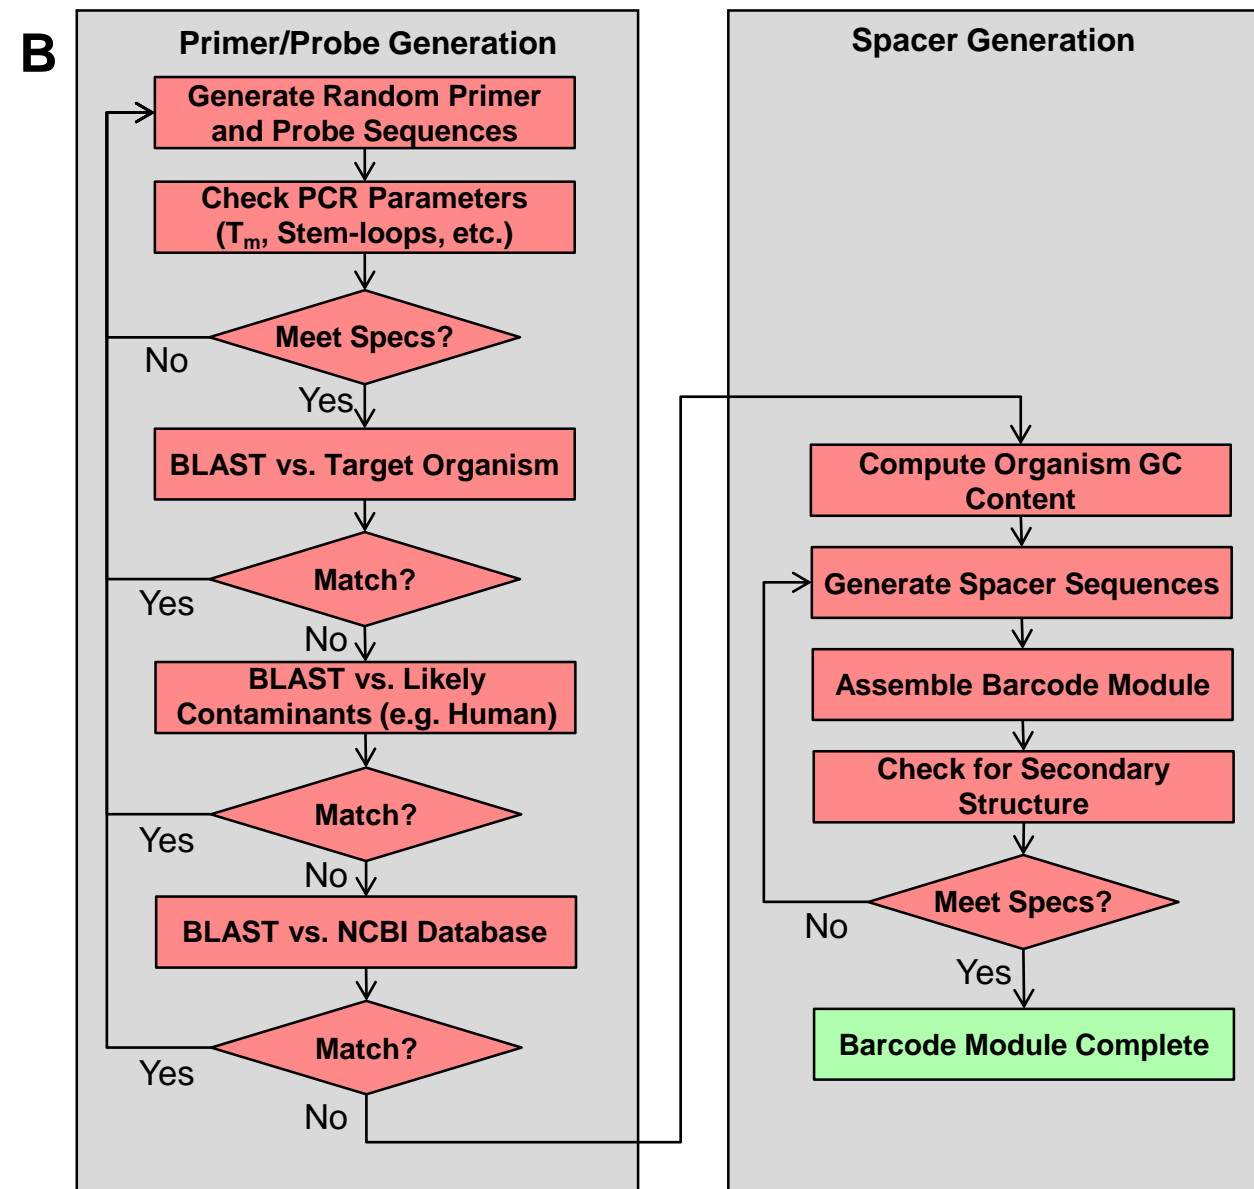

Figure 1

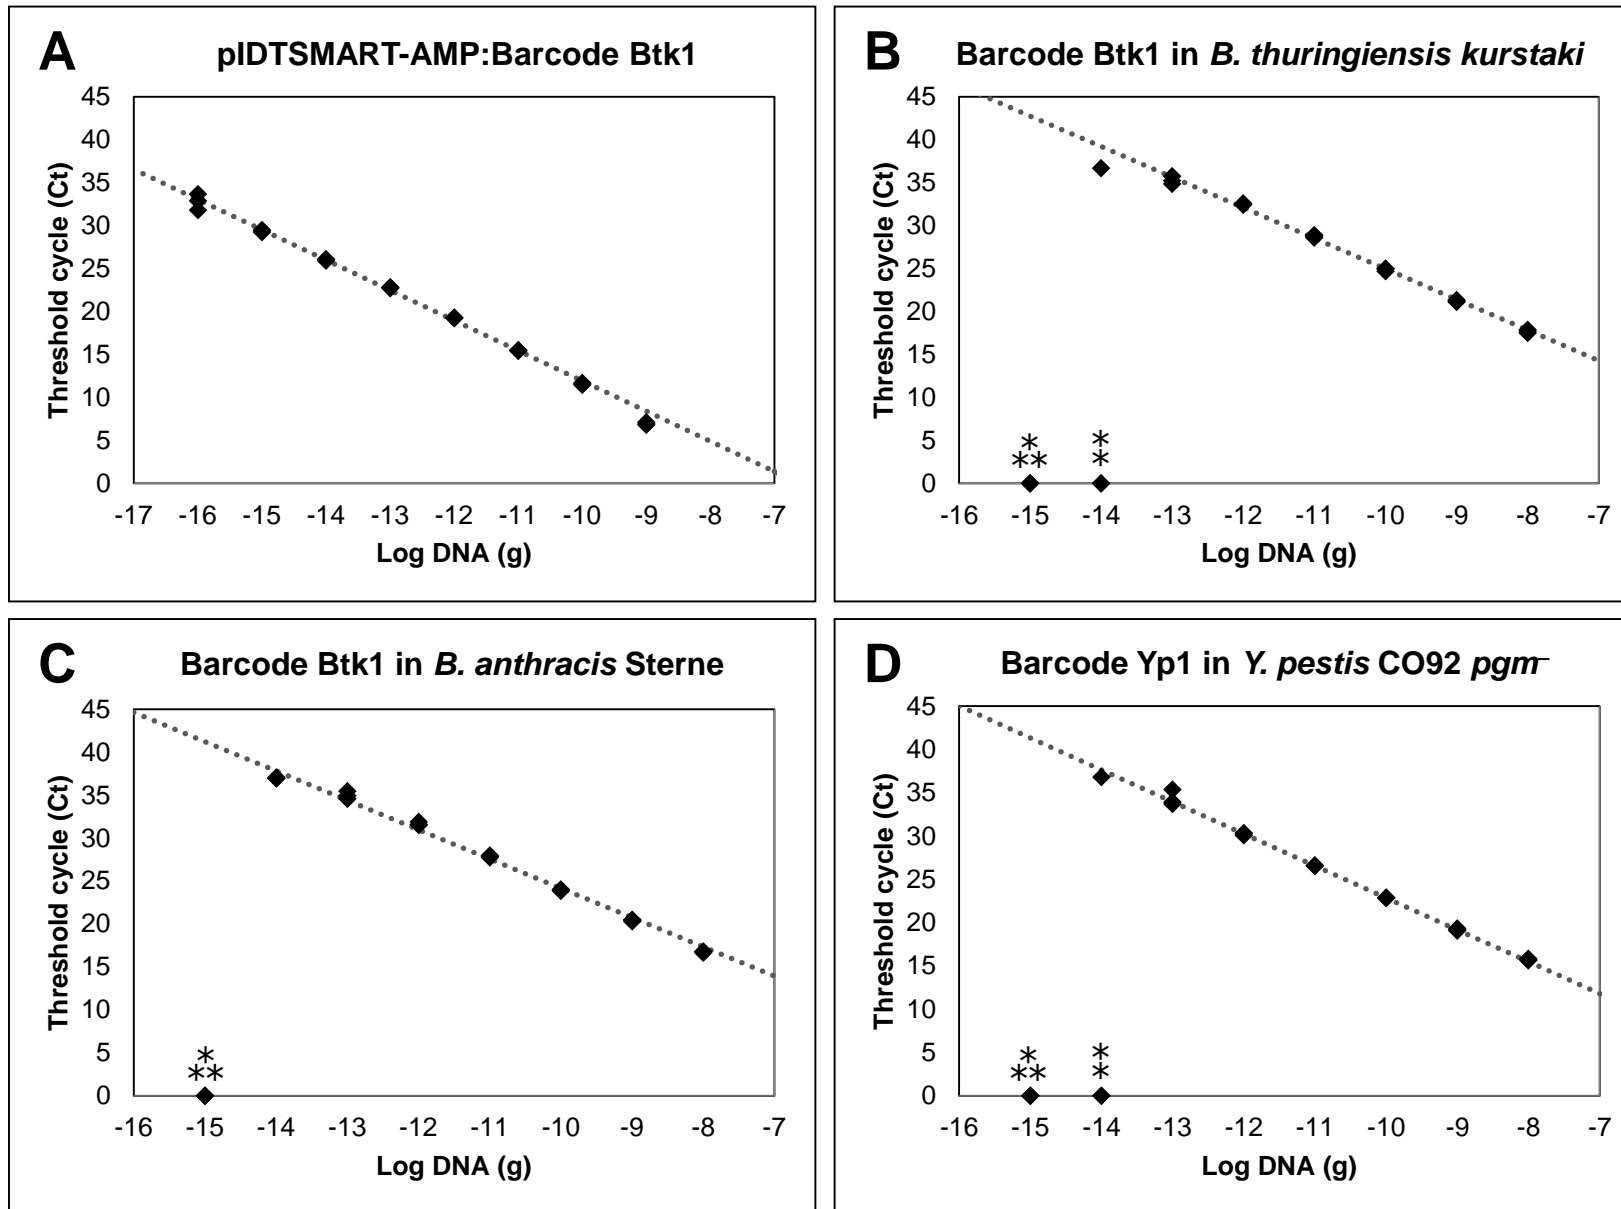

Figure 2

### DNA Template

|       | 1  | 2    | 3    | 4    | 5    | 6    | 7    | 8    | 9    | 10   | 11   | 12              |      |
|-------|----|------|------|------|------|------|------|------|------|------|------|-----------------|------|
| Assay | 1  | 23.0 | ND   | ND   | ND   | ND   | ND   | ND   | ND   | ND   | ND   | ND              |      |
|       | 2  | ND   | 24.5 | ND   | ND   | ND   | ND   | ND   | ND   | ND   | ND   | ND              |      |
|       | 3  | ND   | ND   | 22.5 | ND   | ND   | ND   | ND   | ND   | ND   | ND   | ND              |      |
|       | 4  | ND   | ND   | ND   | 23.4 | ND   | ND   | ND   | ND   | ND   | ND   | ND              |      |
|       | 5  | ND   | ND   | ND   | ND   | 24.5 | ND   | ND   | ND   | ND   | ND   | ND              |      |
|       | 6  | ND   | ND   | ND   | ND   | ND   | 23.9 | ND   | ND   | ND   | ND   | ND              |      |
|       | 7  | ND   | ND   | ND   | ND   | ND   | ND   | 24.0 | ND   | ND   | ND   | ND              |      |
|       | 8  | ND   | ND   | ND   | ND   | ND   | ND   | ND   | 22.7 | ND   | ND   | ND              |      |
|       | 9  | ND   | ND   | ND   | ND   | ND   | ND   | ND   | ND   | 20.4 | ND   | ND              |      |
|       | 10 | ND   | ND   | ND   | ND   | ND   | ND   | ND   | ND   | ND   | 19.3 | ND <sup>a</sup> | ND   |
|       | 11 | ND   | ND   | ND   | ND   | ND   | ND   | ND   | ND   | ND   | ND   | 18.7            | ND   |
|       | 12 | ND   | ND   | ND   | ND   | ND   | ND   | ND   | ND   | ND   | ND   | ND              | 19.6 |

Figure 3
